# Supplementary material for: Coproduction of hydrogen and lactic acid from glucose photocatalysis on band-engineered Zn1-xCdxS homojunction
Source: PubMed Central journal article supplement — iScience. 2021 Jan 28;24(2):102109. doi: 10.1016/j.isci.2021.102109 (PMC7881236; doi:10.1016/j.isci.2021.102109), 2021-01-28
Supplement: mmc1.pdf [file mmc1.pdf]

## Supplemental Information

### Coproduction of hydrogen and lactic acid from glucose photocatalysis on band-engineered $\text{Zn}_{1-x}\text{Cd}_x\text{S}$ homojunction

Heng Zhao, Chao-Fan Li, Xue Yong, Pawan Kumar, Bruna Palma, Zhi-Yi Hu, Gustaaf Van Tendeloo, Samira Siahrostami, Stephen Larter, Dewen Zheng, Shanyu Wang, Zhangxin Chen, Md Golam Kibria, and Jinguang Hu

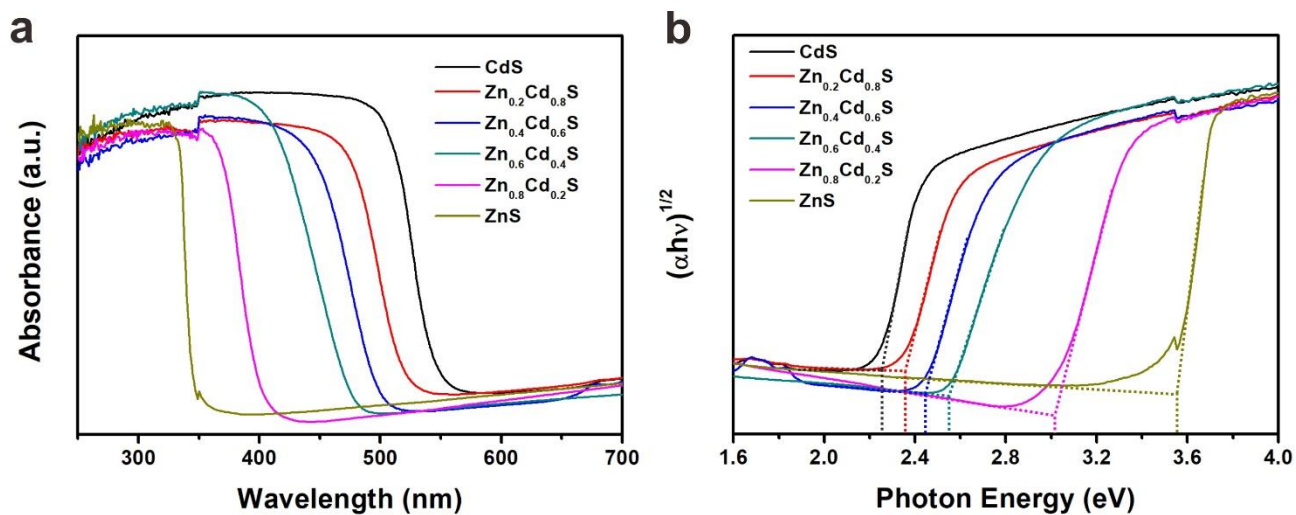

**Figure S1 Optical properties (Related to Figure 1).** (a) UV-vis diffuse reflectance spectra and (b) corresponding Tauc plot of Zn<sub>1-x</sub>Cd<sub>x</sub>S solid solutions with different x values.

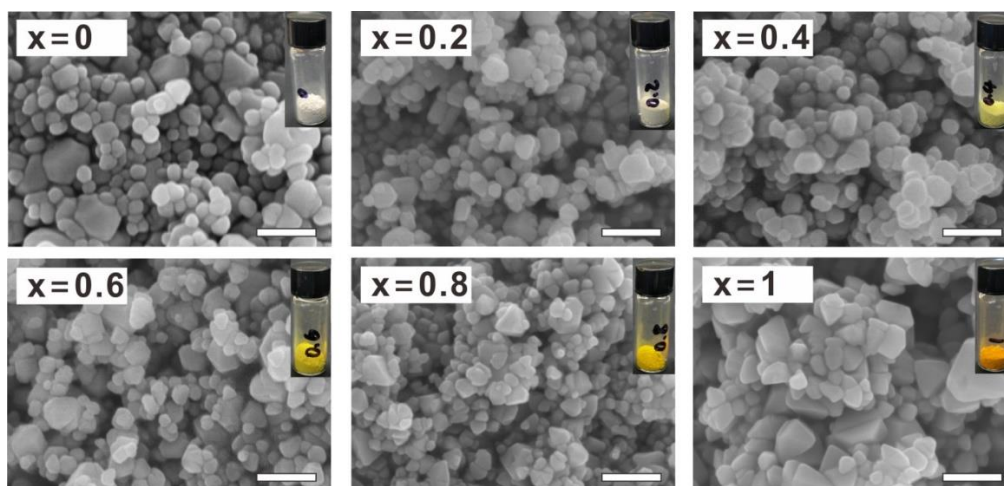

**Figure S2 Morphology characterization (Related to Figure 2).** SEM images and photographs of Zn<sub>1-x</sub>Cd<sub>x</sub>S solid solutions with different x values (scale bar: 200 nm).

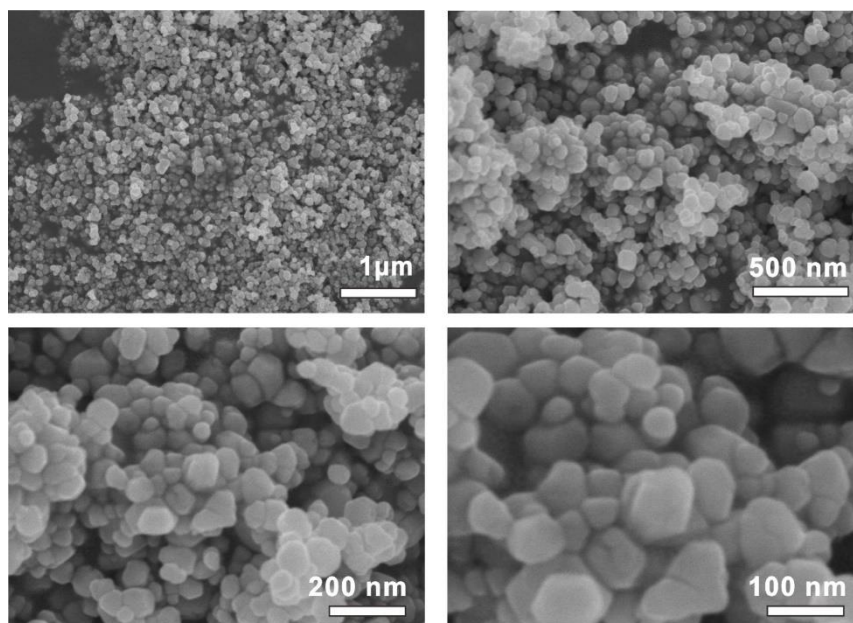

**Figure S3** Morphology characterization (Related to Figure 2). SEM images of  $\text{Zn}_{0.6}\text{Cd}_{0.4}\text{S}$  with different resolutions.

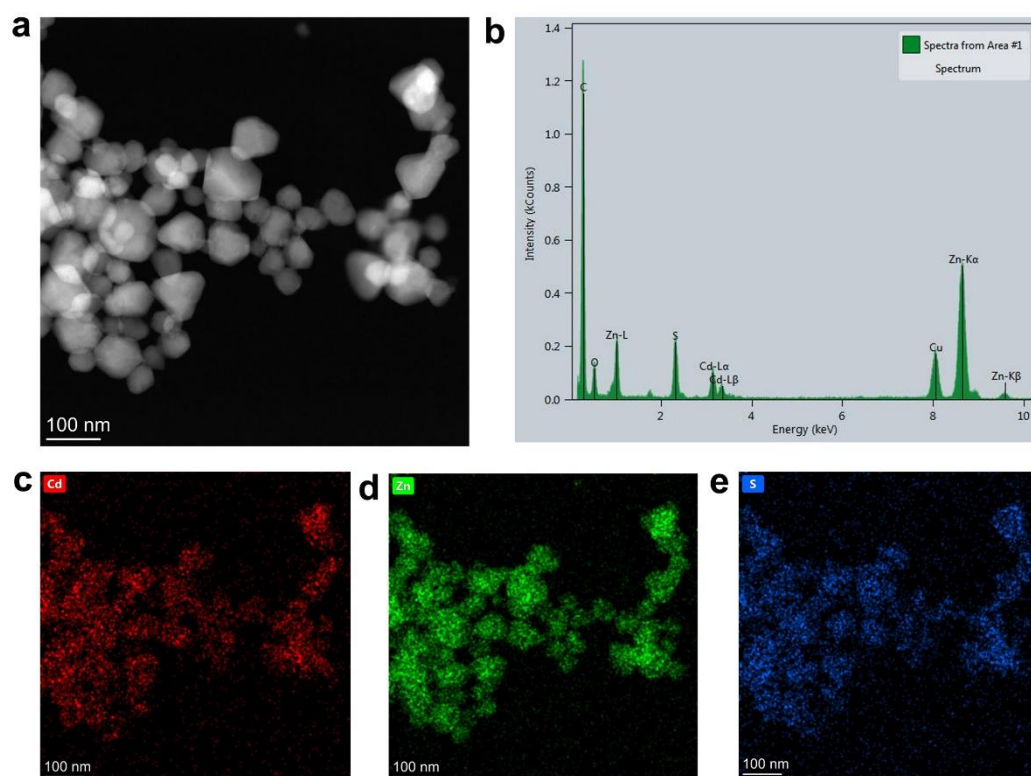

**Figure S4** Morphology characterization (Related to Figure 2). (a) HAADF-STEM image at low magnification, (b) EDS spectrum of the whole area in (a), (c-e) EDS elemental maps: Cd (red), Zn (green) and S (blue) for  $\text{Zn}_{0.6}\text{Cd}_{0.4}\text{S}$ .

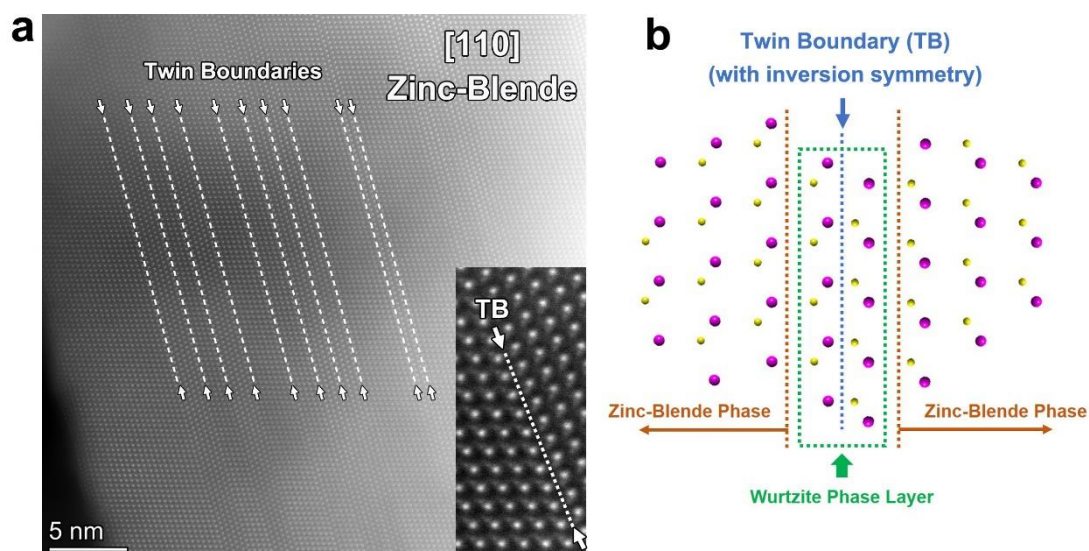

**Figure S5 Structural characterization and schematic illustration of homojunction (Related to Figure 2).** (a) HR-HAADF-STEM image of a zinc-blende particle and corresponding enlarged HAADF-STEM image of a twin boundary, (b) the model of twin boundary with inversion symmetry.

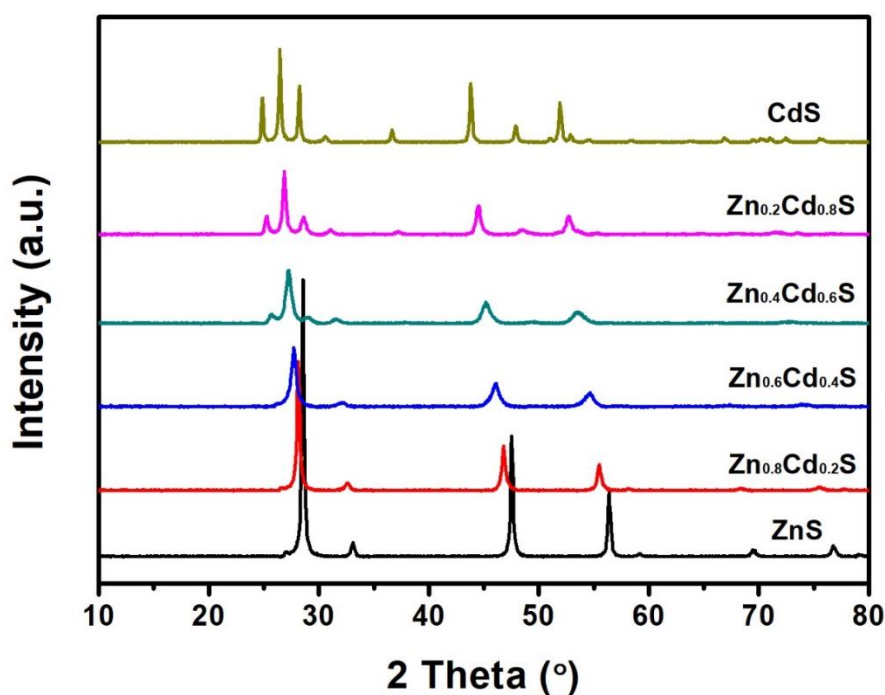

**Figure S6 Crystal structure characterization (Related to Figure 2).** XRD patterns of Zn<sub>1-x</sub>Cd<sub>x</sub>S solid solutions.

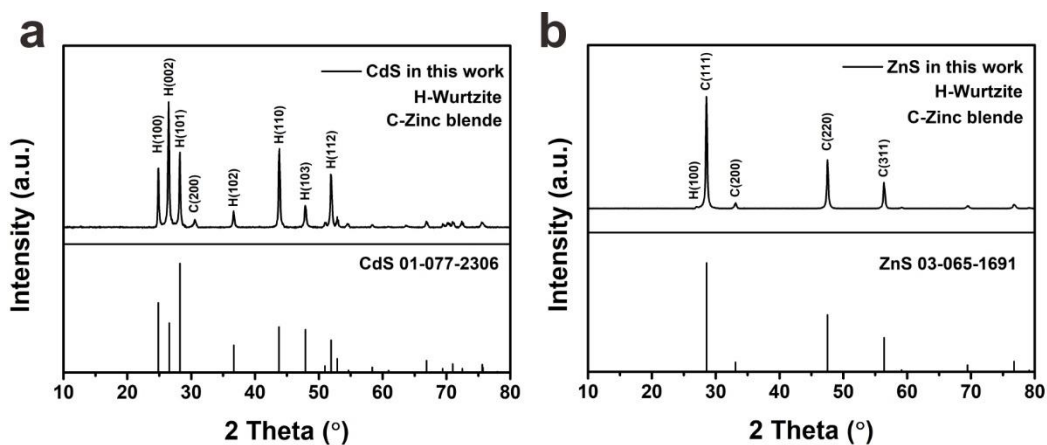

**Figure S7 Crystal structure characterization (Related to Figure 2).** XRD and standard patterns from JCPDS Card for CdS and ZnS.

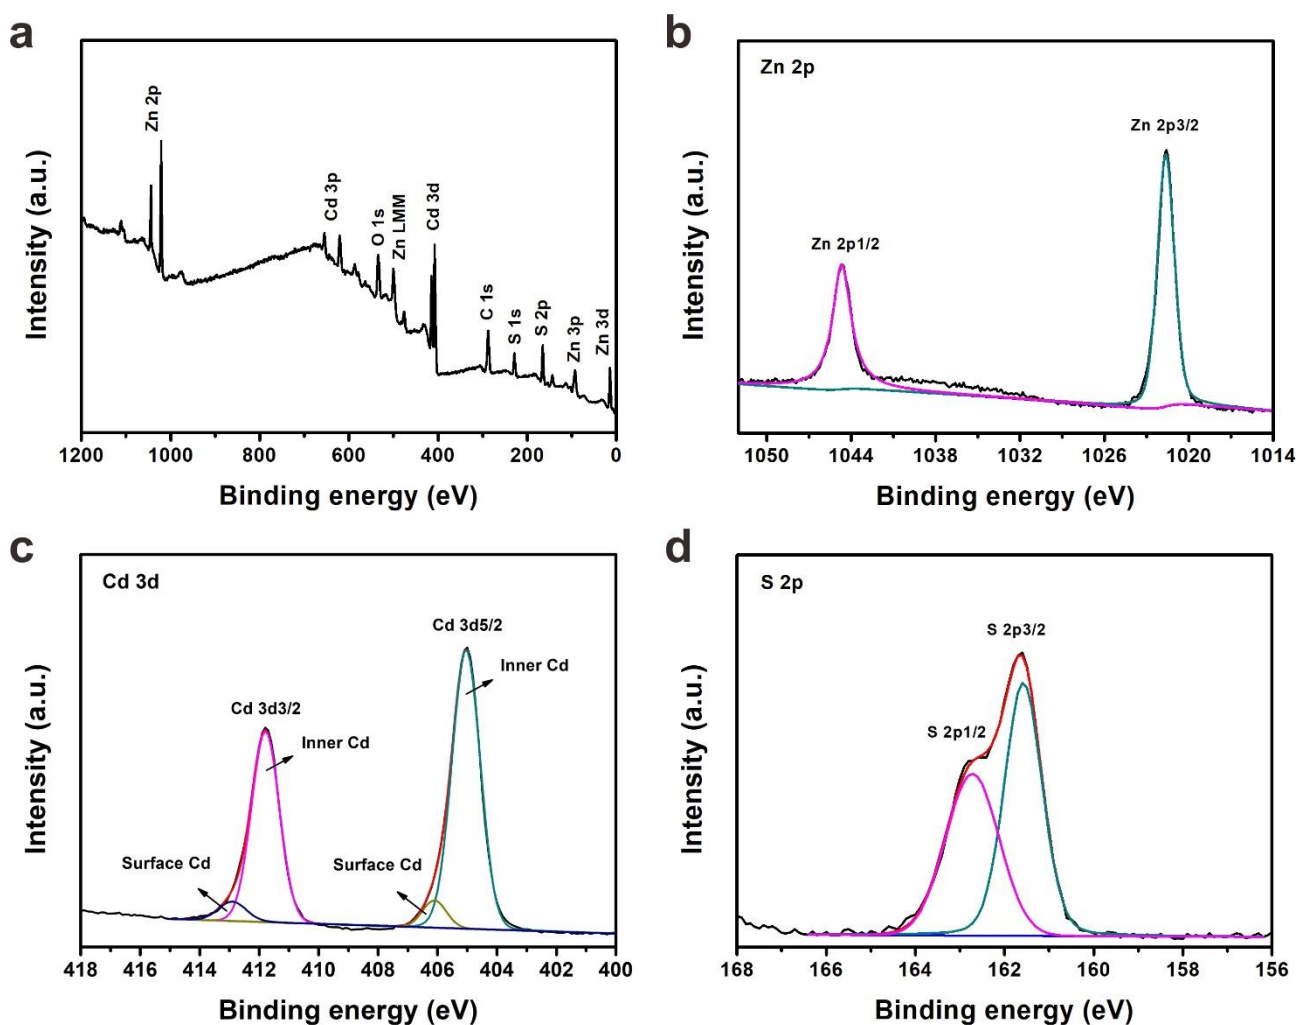

**Figure S8 Component and chemical states (Related to Figure 2).** (a) XPS survey spectrum and (b) Zn 2p, (c) Cd 3d and (d) S 2p spectra of  $\text{Zn}_{0.6}\text{Cd}_{0.4}\text{S}$ .

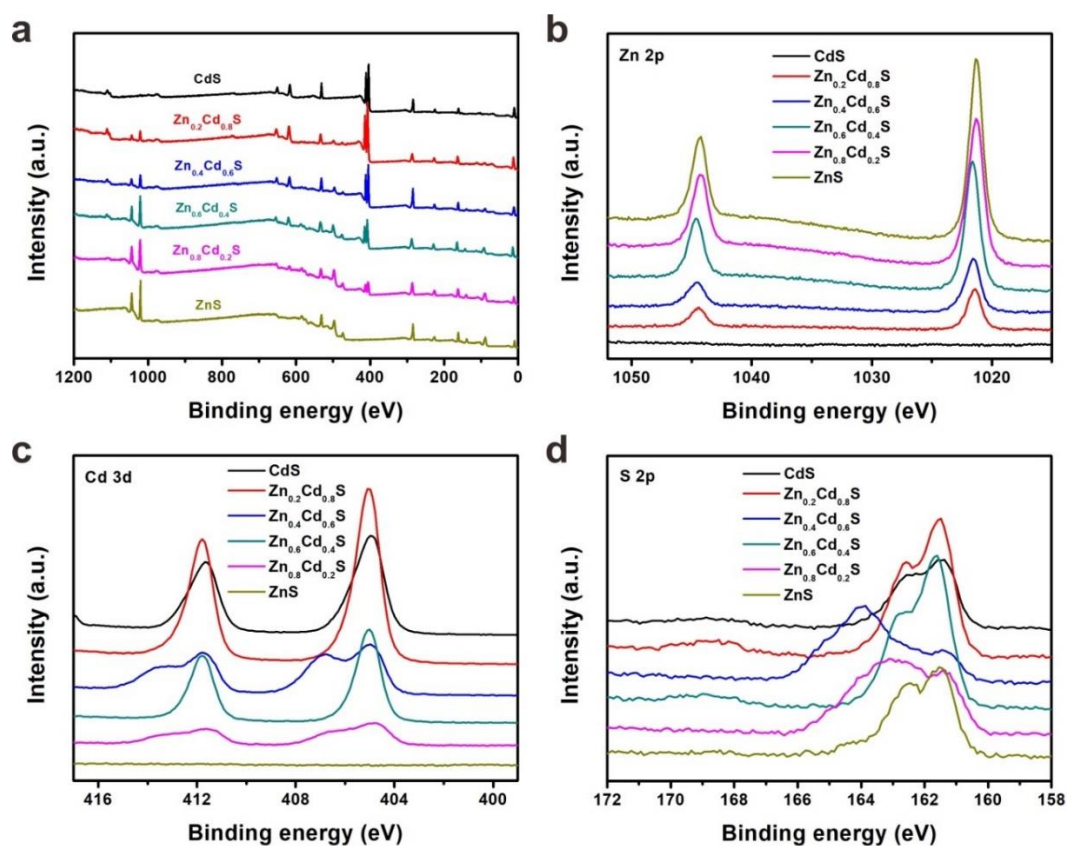

**Figure S9 Component and chemical states (Related to Figure 2).** (a) XPS survey spectra and high-resolution XPS spectra of (b) Zn 2p, (c) Cd 3d and (d) S 2p for  $Zn_{1-x}Cd_xS$  solid solutions with different  $x$  values.

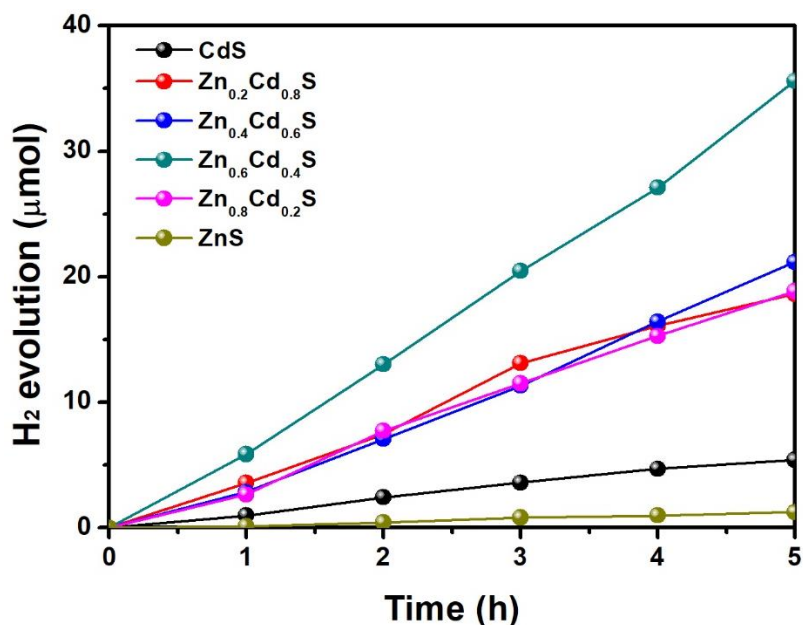

**Figure S10 Hydrogen production (Related to Figure 3).** (a) Photocatalytic hydrogen evolution activities of  $Zn_{1-x}Cd_xS$  solid solutions in 20 g/L glucose solution.

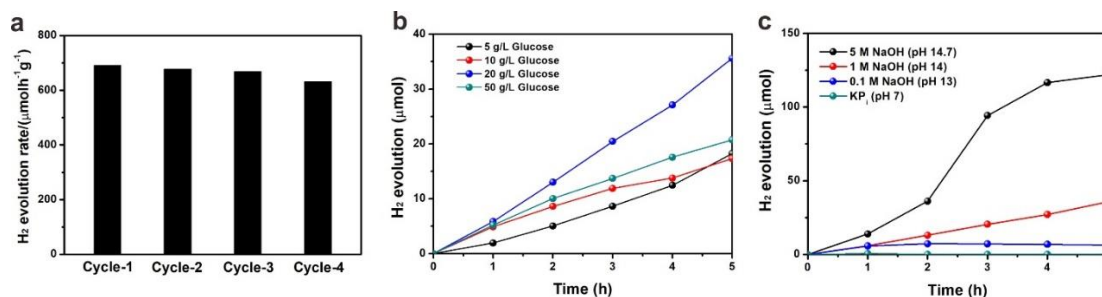

**Figure S11 Hydrogen production (Related to Figure 3).** (a) Photocatalytic stability of Zn<sub>0.6</sub>Cd<sub>0.4</sub>S in four cycles and each cycle is 5 h. (b) Photocatalytic hydrogen performance of Zn<sub>0.6</sub>Cd<sub>0.4</sub>S in different glucose concentrations. (c) Photocatalytic hydrogen performance of Zn<sub>0.6</sub>Cd<sub>0.4</sub>S in different alkali concentration (pH).

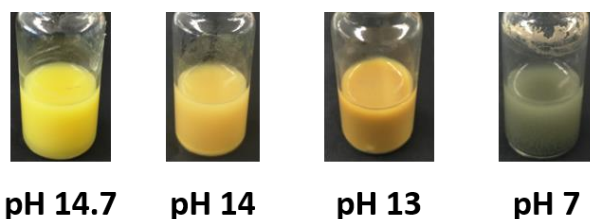

**Figure S12 Photocorrosion (Related to Figure 3).** Photographs of the solutions after reaction in different alkali concentration.

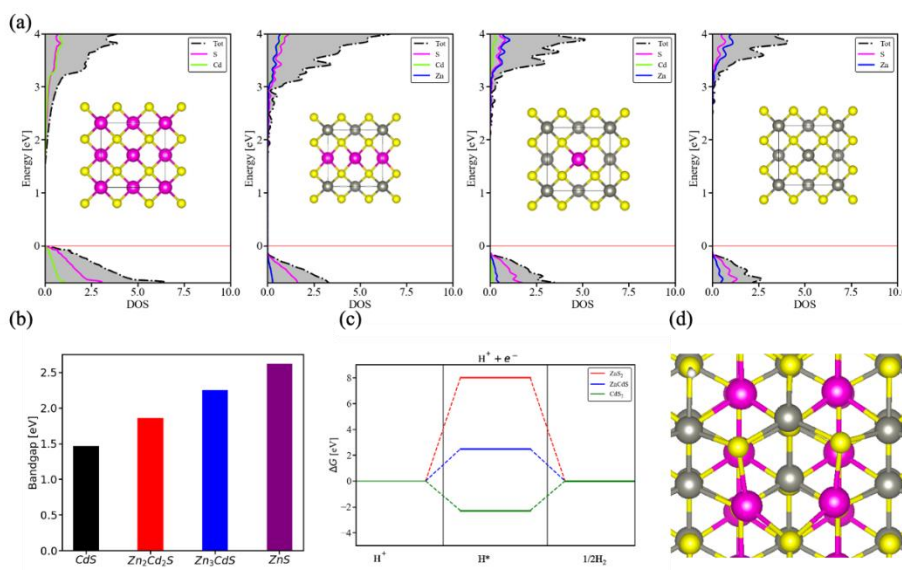

**Figure S13 Structural simulation and bandgap calculation (Related to Figure 3).** (a) The density of states for CdS, Zn<sub>0.5</sub>Cd<sub>0.5</sub>S, Zn<sub>0.75</sub>CdS, ZnS (b) the band gaps for (c) The calculated = free-energy diagram of HER at the equilibrium potential for CdS, Zn<sub>0.5</sub>Cd<sub>0.5</sub>S, and ZnS. (d) The lowest energy model structure of H absorbed on Zn<sub>0.5</sub>Cd<sub>0.5</sub>S.

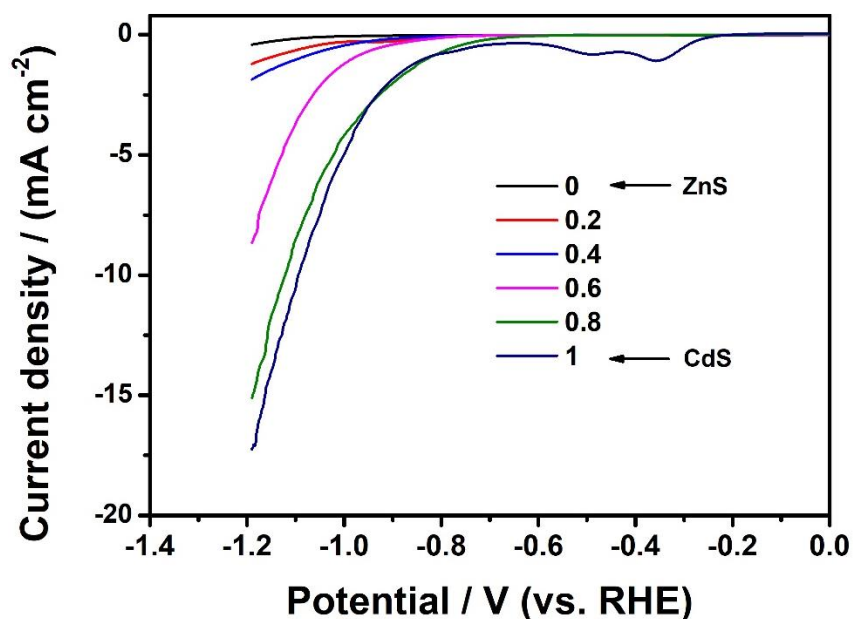

**Figure S14 Electrochemical test (Related to Figure 3).** Polarization curves of  $Zn_{1-x}Cd_xS$  solid solutions with different  $x$  values. Condition: Pt/C with catalyst as the working electrode, Pt wire as the counter electrode and Ag/AgCl as the reference electrode, 1.0 M KOH as electrolyte. The working electrode was obtained by dip-coating 40  $\mu$ L photocatalyst slurry (20 mg sample and 50  $\mu$ L of 5 wt % Nafion solution were dispersed in 1 mL of 3:1 v/v water/isopropanol mixed solvent) onto the prewashed Pt/C electrode.

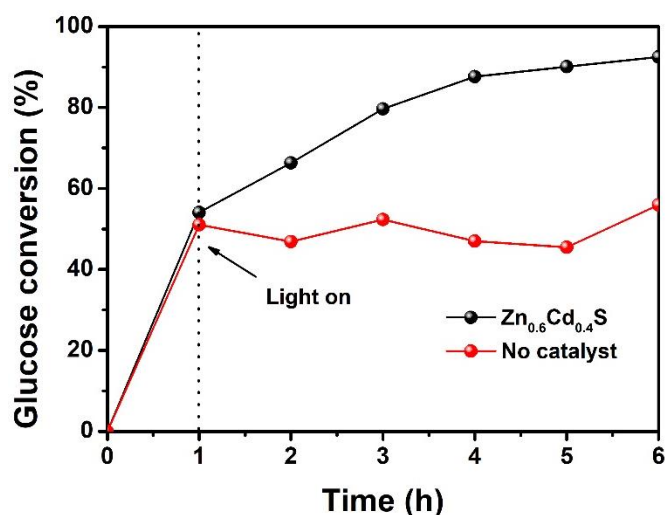

**Figure S15 Glucose conversion (Related to Figure 4).** Glucose conversion along with reaction time with and without photocatalyst. Reaction conditions: 10 mg photocatalyst, 5 mL 20 g/L glucose in 1 M NaOH, vacuum condition, Xenon lamp ( $\lambda = 400-780$  nm), room temperature.



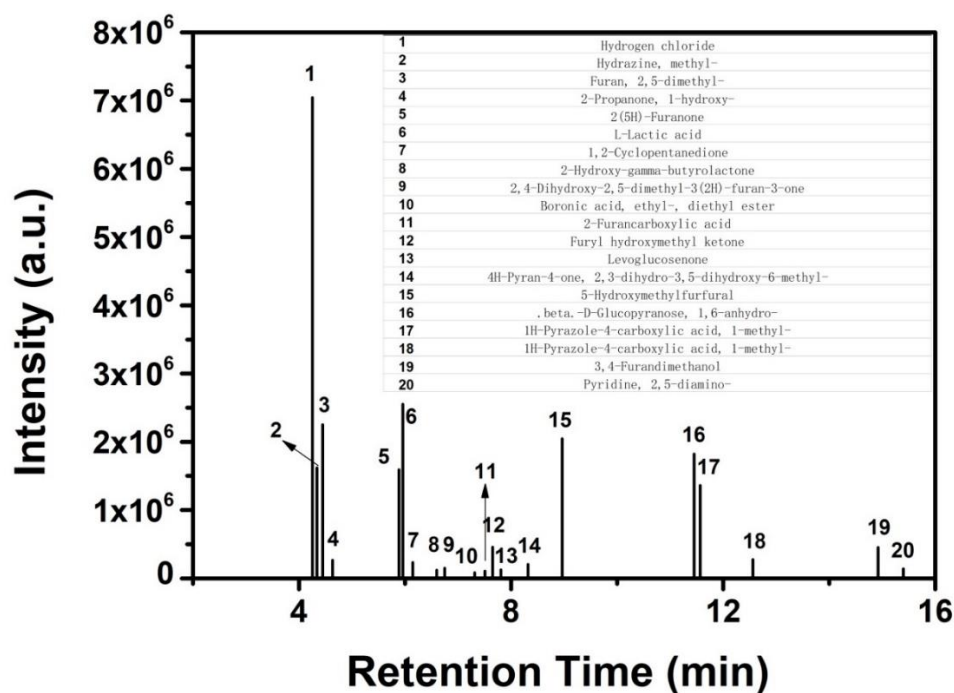

**Figure S16 Products analysis (Related to Figure 4).** GC-MS signals for the products in liquid after photocatalytic reaction and the matched products according to the database.

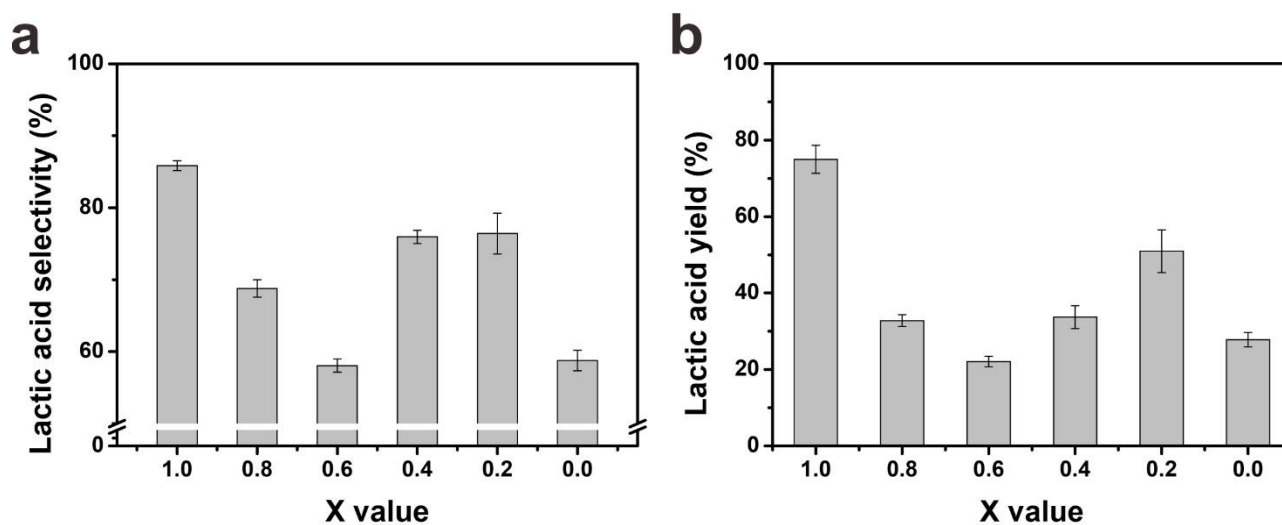

**Figure S17 Lactic acid production (Related to Figure 4).** Lactic acid selectivity and yield of  $Zn_{1-x}Cd_xS$  solid solutions with different x values.

The glucose conversion, selectivity and yield of lactic acid were calculated using the following formulas:

$$\text{Glucose conversion (\%)} = ((\text{Glucose})_{in} - (\text{Glucose})_{out}) / (\text{Glucose})_{in}$$

$$\text{Lactic acid selectivity (\%)} = (\text{Lactic acid})_{out} / ((\text{Lactic acid})_{out} + (\text{Formic acid})_{out} + (\text{Fructose})_{out})$$

$$\text{Lactic acid yield (\%)} = \text{Carbon of lactic acid} / \text{Carbon of converted glucose}$$

Selectivity and yield values were calculated on a molar basis.

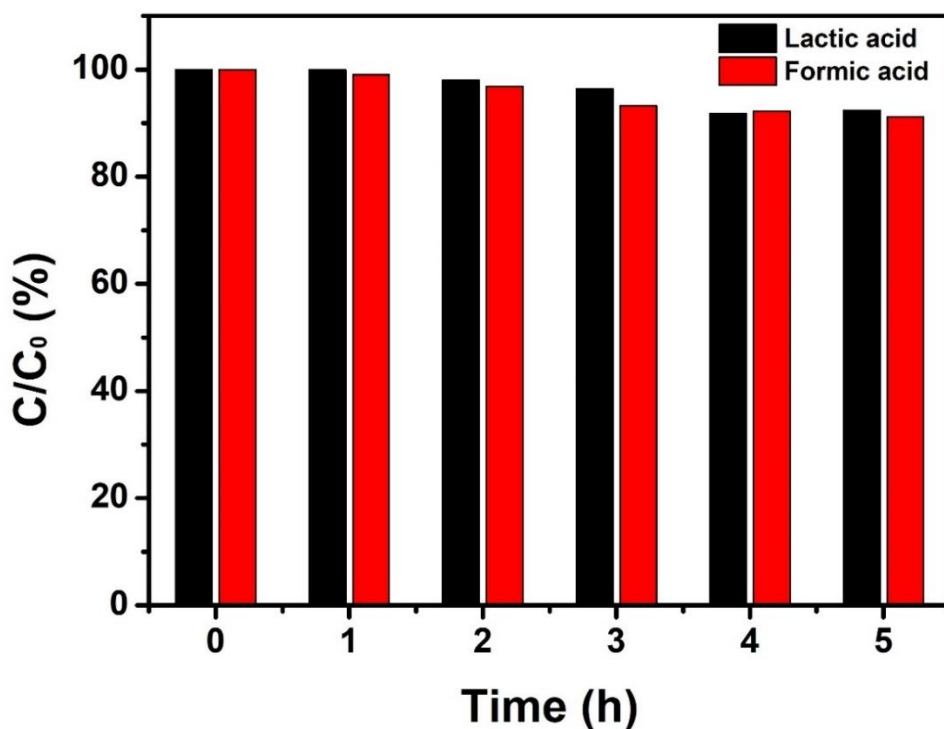

**Figure S18 Stability of lactic acid and formic acid during the reaction (Related to Figure 4).** Lactic acid and formic acid conversion over  $Zn_{0.6}Cd_{0.4}S$ . Reaction conditions: 10 mg photocatalyst, 5 mL 20 g/L lactic acid or formic acid in 1 M NaOH, vacuum condition, Xenon lamp ( $\lambda = 400-780$  nm), room temperature.

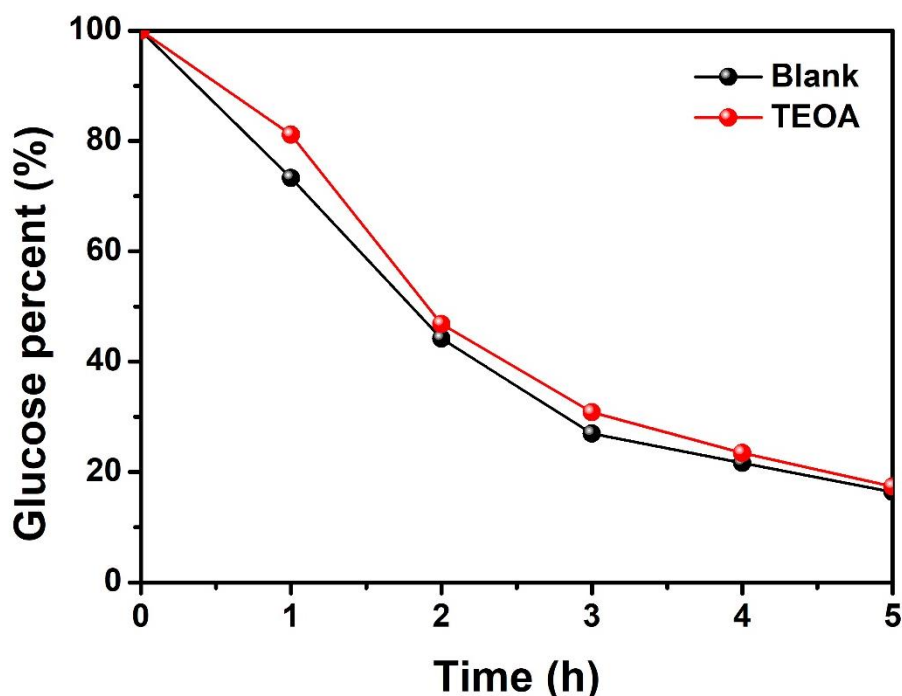

**Figure S19 Scavenger test (Related to Figure 5).** Glucose conversions without any sacrificial agent and in presence of TEOA over  $Zn_{0.6}Cd_{0.4}S$ .

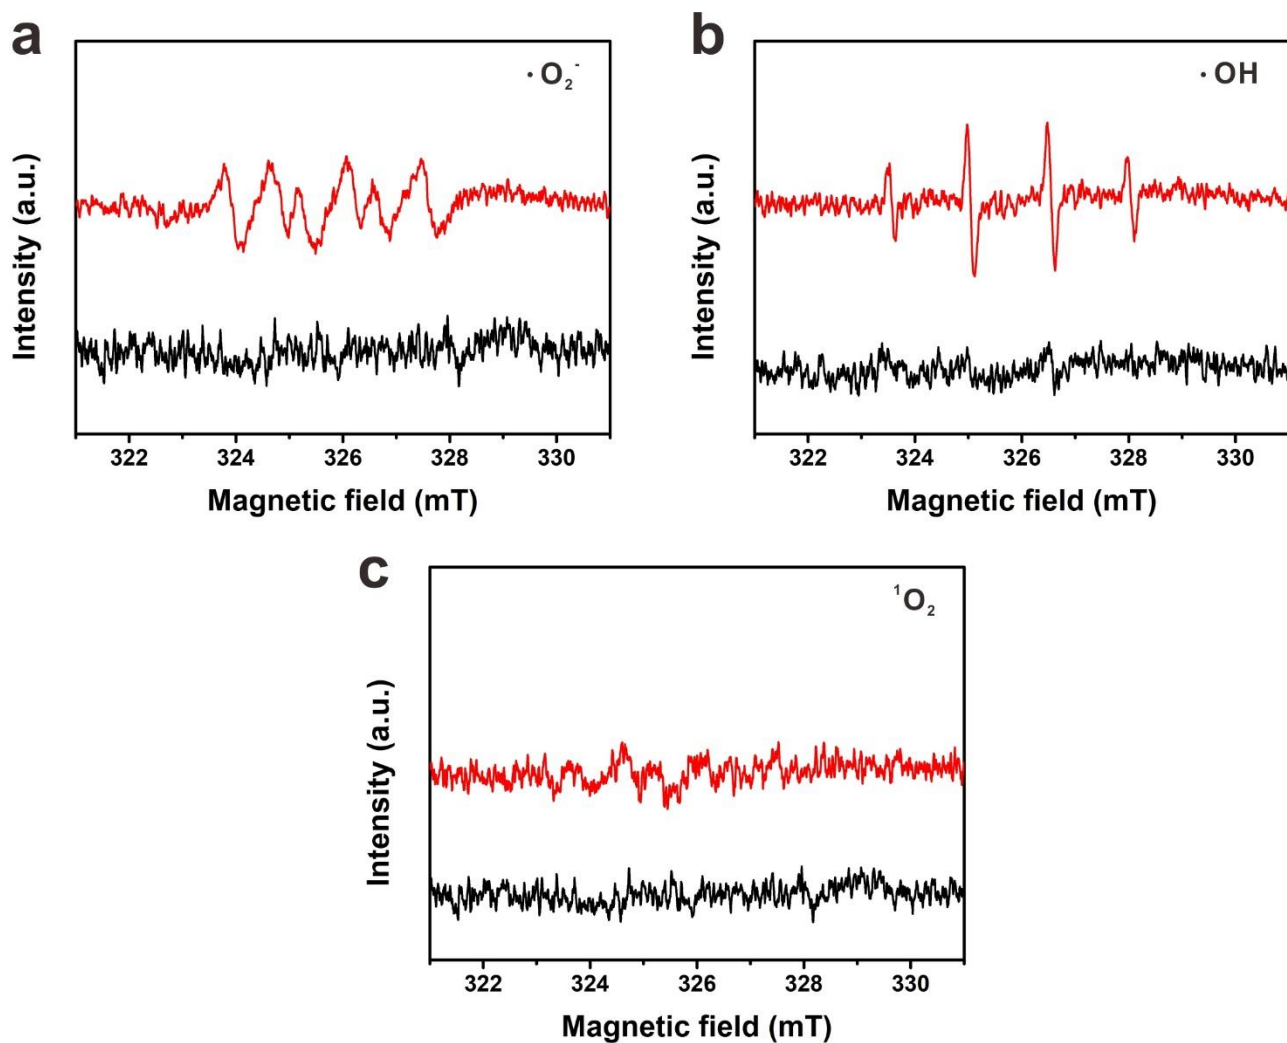

**Figure S20 Active oxygen species (Related to Figure 5).** DMPO ESR spin-trapping for (a)  $\cdot\text{O}_2^-$  and (b)  $\cdot\text{OH}$ , TEMPONE ESR spin-trapping for (c)  $^1\text{O}_2$  over  $\text{Zn}_{0.6}\text{Cd}_{0.4}\text{S}$  (black line: under dark condition and red line: with light irradiation).

## Transparent Methods

### Materials

All the reagents in this experiment were of analytical grade and commercially available. Zinc acetate dihydrate ( $\text{Zn}(\text{CH}_3\text{COO})_2 \cdot 2\text{H}_2\text{O}$ , 98.0%), cadmium acetate dihydrate ( $\text{Cd}(\text{CH}_3\text{COO})_2 \cdot 2\text{H}_2\text{O}$ , 98.0%), thioacetamide (TAA, 99.0%), 1-octanol (99.0%), ethylene glycol (EG, 99.8%) and ethanol were purchased from Millipore Sigma.

### Synthesis of $\text{Zn}_{1-x}\text{Cd}_x\text{S}$ solid solution

In typical, 8 mmol TAA was dissolved in a mixed solution containing 20 mL EG, 10 mL 1-octanol and 10 mL water. Then, a total 4 mmol of  $\text{Zn}(\text{CH}_3\text{COO})_2 \cdot 2\text{H}_2\text{O}$  and  $\text{Cd}(\text{CH}_3\text{COO})_2 \cdot 2\text{H}_2\text{O}$  with the desired atomic ratio was added into the above solution. The obtained aqueous solution was transferred to a 50 mL Teflon-lined stainless-steel autoclave after 30 min of continuous stirring and heated at 180 °C for 4 h. The resulting precipitate was collected after centrifugation, washed with ethanol three times and dried in an oven at 80 °C overnight. A series of  $\text{Zn}_{1-x}\text{Cd}_x\text{S}$  solid solutions with x values of 0, 0.2, 0.4, 0.6, 8 and 1 can be prepared by changing the molar ratio between  $\text{Zn}(\text{CH}_3\text{COO})_2 \cdot 2\text{H}_2\text{O}$  and  $\text{Cd}(\text{CH}_3\text{COO})_2 \cdot 2\text{H}_2\text{O}$ .

### Characterization

The crystalline phase in the samples was examined by powder X-ray diffraction (XRD, D8 ADVANCE) equipped with a Cu anode X-ray tube (Cu K $\alpha$  X-rays,  $\lambda=1.54056$  Å). The rough surface morphology of the samples was observed with a field-emission scanning electron microscope (SEM, Hitachi S-4800). The local structure of the materials has been determined using a double aberration corrected transmission electron microscope (TEM, Thermo Fisher Titan Themis) equipped with a Super-X energy dispersive X-ray detector (EDX) at 300 keV. X-ray photoelectron spectroscopy (XPS) to determine the surface chemical composition and binding energy of constituting elements were recorded on a customized X-ray photoelectron spectrometer (Kratos AXIS Ultra DLD equipped with a monochromatic Al K $\alpha$  source). All the raw data was calibrated using the C (1s) peak of adventitious carbons at a binding energy 284.8 eV. The UV-vis absorption spectra were recorded in a diffuse reflectance mode on a SHIMADZU UV-Vis spectrophotometer with an integrating sphere scanning in a spectral range of 300-800 nm. The Brunauer-Emmett-Teller (BET) specific surface areas of the powders were determined using N<sub>2</sub> adsorption-desorption isotherms at 77 K on a Gemini

VII (Micromeritics Corp.). The zeta potential was measured using the Nanoplus zeta analyzer (Nano-ZS, Malvern).

### **Photocatalytic glucose conversion**

Typically, the photocatalytic testing was performed in closed glass vials (12 mL) at room temperature using a 300 W Xenon lamp (Excelitas Tech.). 10 mg photocatalyst was dispersed in a mixed solution of 20 g/L substrate and 5 mL NaOH (1 M) solution. The closed glass vial containing the above mixture was sonicated and degassed for 0.5 h and finally irradiated under AM1.5 G solar simulated light. The evolved H<sub>2</sub> was periodically quantified by using gas chromatography (GC, PerkinElmer Clarus 590) equipped with a Molecular Sieve 5A packed column and a thermal conductivity detector (TCD). The glucose stock solutions (for calibration) and reaction products were analyzed by using a 1200 HPLC Agilent system equipped with a refractive index detector (RID) and a photodiode array detector (DAD). The column was Hi-Plex H (6.5 × 300 mm, 8 μm, Agilent) and 0.005 M H<sub>2</sub>SO<sub>4</sub> was used as an eluting solvent with a flow rate of 0.5 mL/min. Each experiment was repeated for three times to have the error bar.
